# Supplementary material
Source: publisher site journal article supplement (https://www.dovepress.com/article/260641)
Supplement: Supplementary file 1 [file get_supplementary_file.php]

Appendix

Table 1 Most frequently cited papers

|  | | | |
| --- | --- | --- | --- |
| Authors | Title | No. of Citation | Source of Publication |
| Smallridge et al. (2012) | American thyroid association guidelines for management of patients with anaplastic thyroid cancer | 338 | Thyroid |
| Majewski et al. (2011) | What can exome sequencing do for you? | 211 | Journal of Medical Genetics |
| Antal et al. (2017) | Low intensity transcranial electric stimulation: Safety, ethical, legal regulatory and application guidelines | 184 | Clinical Neurophysiology |
| Golubnitschaja et al. (2012) | General Report &amp; Recommendations in Predictive, Preventive and Personalised Medicine 2012: White Paper of the European Association for Predictive, Preventive and Personalised Medicine | 123 | EPMA Journal |
| Biesecker L.G.(2012) | Opportunities and challenges for the integration of massively parallel genomic sequencing into clinical practice: Lessons from the ClinSeq project | 113 | Genetics in Medicine |
| Desai A.N. and Jere A.(2012) | Next-generation sequencing: Ready for the clinics? | 108 | Clinical Genetics |
| Wellman-Labadie O. and Zhou Y. (2010) | The US Orphan Drug Act: Rare disease research stimulator or commercial opportunity? | 103 | Health Policy |
| Van Stralen et al. (2014) | Survival and clinical outcomes of children starting renal replacement therapy in the neonatal period | 102 | Kidney International |
| Punwani et al.(2010) | Pediatric and adolescent lymphoma: COmparison of Whole-Body STIR half-fourier rare MR imaging with an enhanced PET/CT reference for initial staging | 98 | Radiology |
| Zigon J. (2010) | "HIV is God's blessing": Rehabilitating morality in neoliberal Russia | 97 | "HIV is God's Blessing": Rehabilitating Morality in Neoliberal Russia |
| Bass C. and Halligan P. (2014) | Factitious disorders and malingering: Challenges for clinical assessment and management | 95 | The Lancet |
| Korf B.R. and Rehm H.L.(2013) | New approaches to molecular diagnosis | 82 | JAMA - Journal of the American Medical Association |
| Mascalzoni et al.(2015) | International Charter of principles for sharing bio-specimens and data | 78 | European Journal of Human Genetics |
| Foo J.-N., Liu J.-J. and Tan E.-K. (2012) | Whole-genome and whole-exome sequencing in neurological diseases | 72 | Nature Reviews Neurology |
| Kwakkenbos et al. (2013) | The Scleroderma Patient-centered Intervention Network (SPIN) Cohort: Protocol for a cohort multiple randomised controlled trial (cmRCT) design to support trials of psychosocial and rehabilitation interventions in a rare disease context | 70 | BMJ Open |
| Flaherty et al. (2017) | Design of the PF-ILD trial: A double-blind, randomised, placebo-controlled phase III trial of nintedanib in patients with progressive fibrosing interstitial lung disease | 64 | BMJ Open Respiratory Research |
| Luce J.M. (2010) | A history of resolving conflicts over end-of-life care in intensive care units in the United States | 63 | Critical Care Medicine |
| Rubinstein et al. (2010) | Creating a global rare disease patient registry linked to a rare diseases biorepository database: Rare Disease-HUB (RD-HUB) | 62 | Contemporary Clinical Trials |
| Kuhn J. (2010) | Deep brain stimulation for psychiatric disorders | 59 | Deutsches Arzteblatt |
| Warnich et al. (2011) | Pharmacogenomic research in South Africa: Lessons learned and future opportunities in the rainbow nation | 54 | Current Pharmacogenomics and Personalized Medicine |
| Lyon et al. (2011) | Exome sequencing and unrelated findings in the context of complex disease research: ethical and clinical implications. | 51 | Discovery medicine |
| Rizzolo et al. (2013) | Male breast cancer: Genetics, epigenetics, and ethical aspects | 50 | Annals of Oncology |
| Kinkorová J. (2016) | Biobanks in the era of personalized medicine: Objectives, challenges, and innovation | 48 | EPMA Journal |
| Kleiderman et al. (2014) | Returning incidental findings from genetic research to children: Views of parents of children affected by rare diseases | 48 | Journal of Medical Ethics |
| Sadetzki et al. (2014) | The MOBI-Kids study protocol: Challenges in assessing childhood and adolescent exposure to electromagnetic fields from wireless telecommunication technologies and possible association with brain tumor risk | 47 | Frontiers in Public Health |
| Gershon E.S. and Alliey-Rodriguez N. (2013) | New ethical issues for genetic counseling in common mental disorders | 45 | American Journal of Psychiatry |
| Lopez-Bastida et al. (2012) | Social and economic costs and health-related quality of life in stroke survivors in the Canary Islands, Spain | 43 | BMC Health Services Research |
| Chitnis T. et al. (2013) | International pediatric MS study group clinical trials summit: Meeting report | 38 | Neurology |
